# Supplementary material for: Facilitating autonomous, confident and satisfying choices: a mixed-method study of women’s choice-making in prenatal screening for common aneuploidies
Source: Springer Nature journal article supplement (doi:10.1186/s12884-018-1752-y), 2018-05-02
Supplement: MOESM3 [file 15733120]

**Additional file 3. Short-form of the State Scale of the Spielberger State-Trait Anxiety Inventory**

|                   | Not at all | Somewhat | Moderately | Very much |
|-------------------|------------|----------|------------|-----------|
| 1. I feel calm    | 1          | 2        | 3          | 4         |
| 2. I am tense     | 1          | 2        | 3          | 4         |
| 3. I feel upset   | 1          | 2        | 3          | 4         |
| 4. I am relaxed   | 1          | 2        | 3          | 4         |
| 5. I feel content | 1          | 2        | 3          | 4         |
| 6. I am worried   | 1          | 2        | 3          | 4         |

Source: Marteau TM, Bekker H: The development of a six-item short-form of the state scale of the Spielberger State-Trait Anxiety Inventory (STAI). Br J Clin Psychol 1992, 31(3):301-306.
